# Supplementary material for: Interactions between Cryptosporidium, Enterocytozoon, Giardia and Intestinal Microbiota in Bactrian Camels on Qinghai-Tibet Plateau, China
Source: MDPI journal article supplement (doi:10.3390/app11083595), 2021-04-16
Supplement: s1 [file s1]

**Interactions between *Cryptosporidium*, *Enterocytozoon*, *Giardia* and intestinal microbiota in  
Bactrian camels on Qinghai-Tibet Plateau, China**

Xiaoqi Wang<sup>1, 2, 3</sup>, Zhichao Zhang<sup>3</sup>, Weiwen Yin<sup>3</sup>, Qingxun Zhang<sup>3</sup>, Rujing Wang<sup>1, 2\*</sup>, Ziyuan Duan<sup>3\*</sup>

<sup>1</sup> Hefei Institutes of Physical Science, Chinese Academy of Sciences, Hefei, 230031, China;

<sup>2</sup> University of Science and Technology of China, Hefei, 230026, China;

<sup>3</sup> Institute of Genetics and Developmental Biology, Chinese Academy of Sciences, Beijing, 100101,  
China.

\*Co-corresponding author :

Ziyuan Duan, zyduan@genetics.ac.cn, No.1 Beichen West Road, Chaoyang District, Beijing, 100101,  
China, Tel +86 10 64803631, Fax +86 10 64804421.

Rujing Wang, rjwang@iim.ac.cn, No.350 Shushan Road, Shushan District, Hefei, 230031, China, Tel  
+86 551 65592968, Fax +86 551 65592420.

**Table S1. Primers of small-subunit rRNA nested PCR**

| Parasites                   | Primers                                         |
|-----------------------------|-------------------------------------------------|
| <i>Cryptosporidium spp.</i> | Primary PCR: 5'-TTCTAGAGCTAATACATGCG-3' &       |
|                             | 5'-CCCATTCCTTCGAAACAGGA-3'                      |
|                             | Secondary PCR: 5'-GGAAGGGTTGTATTTATTAGATAAAG-3' |
|                             | & 5'-AAGGAGTAAGGAACAACCTCCA-3'                  |
| <i>E. bieneusi</i>          | Primary PCR: 5'-GGTCATAGGGATGAAGAG-3' &         |
|                             | 5'-TTCGAGTTCTTTTCGCGCTC-3'                      |
|                             | Secondary PCR: 5'-GCTCTGAATATCTATGGCT-3' &      |
|                             | 5'-ATCGCCGACGGATCCAAGTG-3'                      |
| <i>G. duodenalis</i>        | Primary PCR: 5'-ATCCGGTCGATCCTGCCG-3' &         |
|                             | 5'-AGGATCAGGGTTCGACT-3'                         |
|                             | Secondary PCR: 5'-CGGTCGATCCTGCCGGA-3' &        |
|                             | 5'-GGCGGAGGATCAGGGT-3'                          |

**Table S2. OTU table summary**

| Sample ID  | Group   | Non-chimeras    | OUT number |
|------------|---------|-----------------|------------|
|            |         | sequence counts |            |
| Control 1  | Control | 30270           | 4216       |
| Control 2  | Control | 30421           | 4240       |
| Control 3  | Control | 30391           | 4191       |
| Control 4  | Control | 31357           | 3937       |
| Control 5  | Control | 30717           | 4232       |
| Control 6  | Control | 30871           | 3845       |
| Control 7  | Control | 30230           | 4457       |
| Control 8  | Control | 31666           | 3719       |
| Control 9  | Control | 31425           | 3755       |
| Control 10 | Control | 31351           | 4091       |
| Control 11 | Control | 31397           | 3658       |
| Control 12 | Control | 31199           | 4123       |
| Control 13 | Control | 31480           | 3793       |
| Control 14 | Control | 31208           | 3926       |
| Control 15 | Control | 31216           | 3778       |
| Control 16 | Control | 31107           | 4005       |
| Control 17 | Control | 30937           | 4033       |
| A1         | Group A | 30719           | 3963       |
| A2         | Group A | 31418           | 3877       |

---

|     |         |       |      |
|-----|---------|-------|------|
| A3  | Group A | 31084 | 3221 |
| A4  | Group A | 30009 | 3595 |
| A5  | Group A | 30328 | 4028 |
| A6  | Group A | 31389 | 3878 |
| A7  | Group A | 29248 | 4973 |
| A8  | Group A | 31326 | 3655 |
| A9  | Group A | 32016 | 3504 |
| A10 | Group A | 31107 | 3741 |
| A11 | Group A | 31563 | 3653 |
| A12 | Group A | 31213 | 3719 |
| B1  | Group B | 31748 | 3626 |
| C1  | Group C | 30921 | 4075 |
| C2  | Group C | 31023 | 3790 |
| D1  | Group D | 31581 | 3780 |
| D2  | Group D | 30832 | 3827 |
| D3  | Group D | 31395 | 3621 |
| D4  | Group D | 31904 | 3389 |
| D5  | Group D | 31119 | 3529 |
| E1  | Group E | 31214 | 3539 |

---
